# Supplementary material for: Measurement report: Emissions of intermediate-volatility organic compounds from vehicles under real-world driving conditions in an urban tunnel
Source: Copernicus journal article supplement (doi:10.5194/acp-21-10005-2021), 2021-07-06
Supplement: Supplementary file 1 [file acp-21-10005-2021-supplement.pdf]

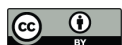

*Supplement of*

**Measurement report: Emissions of intermediate-volatility organic compounds from vehicles under real-world driving conditions in an urban tunnel**

**Hua Fang et al.**

*Correspondence to:* Xinming Wang (wangxm@gig.ac.cn) and Yanli Zhang (zhang\_yl86@gig.ac.cn)

The copyright of individual parts of the supplement might differ from the article licence.

## 23 Text S1

### 24 Quantification of IVOCs

25 Speciated IVOCs were identified based on their retention times and mass spectra, and were  
26 quantified by 18 authentic standards including C<sub>12</sub>-C<sub>22</sub> n-alkanes and 8 polycyclic aromatic  
27 hydrocarbons (PAHs). The pristane and phytane were quantified by the calibration curves of the n-  
28 alkanes (n-C<sub>17</sub> and n-C<sub>18</sub>) near them.

29 Total IVOCs mass were quantified by using the method developed by Zhao et al. (2014). Firstly, the  
30 total ion chromatogram (TIC) was divided into 11 chromatogram bins based on retention times of  
31 C<sub>12</sub>-C<sub>22</sub> n-alkanes. The start time and end time of chromatogram bin were determined by successive  
32 n-alkanes. The example was illustrated as following:

$$33 \quad t_{n, \text{ Bin-start}} = \frac{t_{n-1} + t_n}{2}$$
$$34 \quad t_{n, \text{ Bin-end}} = \frac{t_n + t_{n+1}}{2}$$

35 Where n refers to the carbon number of n-alkane which centered in the corresponding chromatogram  
36 bin. The  $t_{n, \text{ Bin-start}}$  and  $t_{n, \text{ Bin-end}}$  respectively represent the start time and end time of chromatogram  
37 bin. The  $t_{n-1}$ ,  $t_n$  and  $t_{n+1}$  are the retention times of C<sub>n-1</sub>, C<sub>n</sub> and C<sub>n+1</sub> n-alkanes, respectively.

38 Secondly, the IVOCs mass in each defined chromatogram bin ( $M_{\text{IVOCs}, B_n}$ ) was calculated by  
39 following equation:

$$40 \quad M_{\text{IVOCs}, B_n} = \frac{TA_{\text{TIC}, B_n}}{RF_{n\text{-alkanes}, C_n}} = \frac{TA_{m/z 57, B_n}}{RF_{n\text{-alkanes}, C_n}} \times \frac{1}{f_{m/z 57, \text{TIC}, B_n}}$$

41 Where  $TA_{\text{TIC}, B_n}$  is the abundance of TIC in the B<sub>n</sub> chromatogram bin;  $RF_{n\text{-alkane}, C_n}$  is the response  
42 factor of the C<sub>n</sub> n-alkane;  $TA_{m/z 57, B_n}$  refers to the abundance of m/z 57 in the B<sub>n</sub> chromatogram bin;  
43  $f_{m/z 57, \text{TIC}, B_n}$  is the fraction of the m/z 57 in TIC of the B<sub>n</sub> chromatogram bin. The total IVOCs mass  
44 was the sum of the IVOCs mass calculated in each defined chromatogram bin.

45 Thirdly, the residual IVOCs (subtracting the speciated IVOCs), which was named as unresolved  
46 complex mixtures IVOCs (UCM IVOCs) in previous studies (Zhao et al., 2014, 2015, 2016), were  
47 further divided into unspciated branched alkanes (b-alkanes) and unspciated cyclic compounds.  
48 Here, we assumed that the signal of m/z 57 all came from n-alkanes and b-alkanes. The unspciated  
49 b-alkanes mass ( $M_{\text{b-alkane}, B_n}$ ) was defined as the difference between calculated mass of m/z 57 and  
50 n-alkane that falling in the same chromatogram bin (Zhao et al., 2015, 2016). Obviously, this

51 assumption would somewhat cause an overestimation of b-alkanes in that other compounds like  
 52 cyclic alkanes also could contribute to the abundance of m/z 57 (Zhao et al., 2014).

$$\begin{aligned}
 53 \quad M_{b\text{-alkane}, B_n} &= \frac{BA_{b\text{-alkane}, B_n}}{RF_{n\text{-alkane}, C_n}} = \frac{BA_{m/z\ 57, B_n}}{RF_{n\text{-alkane}, C_n}} \times \frac{1}{f_{m/z\ 57, b\text{-alkane}}} \\
 54 \quad &= \frac{(TA_{m/z\ 57, B_n} - NA_{m/z\ 57, C_n})}{RF_{n\text{-alkane}, C_n}} \times \frac{1}{f_{m/z\ 57, b\text{-alkane}}}
 \end{aligned}$$

55 Where  $BA_{b\text{-alkane}, B_n}$  is the abundance of b-alkanes in  $B_n$  chromatogram bin. The  $BA_{m/z\ 57, B_n}$   
 56 represents the abundance of m/z 57 came from b-alkanes in the  $B_n$  chromatogram bin while  $NA_{m/z\ 57, C_n}$   
 57  $NA_{m/z\ 57, C_n}$  is the abundance of m/z 57 produced by the  $C_n$  n-alkane.  $TA_{m/z\ 57, B_n}$  is the total abundance of  
 58 m/z 57 in  $B_n$  chromatogram bin. The  $f_{m/z\ 57, b\text{-alkane}}$  is the average fraction of m/z 57 in the TIC of b-  
 59 alkanes.

60 Lastly, the mass of unspiciated cyclic compounds were calculated as a consequence of subtracting  
 61 both the masses of speciated IVOCs and unspiciated b-alkanes from the total determined IVOCs  
 62 mass.

## 63 **Text S2**

### 64 **Calculation of fuel-based emission factor**

65 The fuel-based emission factor of IVOCs was calculated as following:

$$66 \quad \text{fuel - based EF (mg kg}^{-1}\text{)} = \frac{\text{mileage - based EF (mg km}^{-1}\text{)}}{\text{fuel density (kg L}^{-1}\text{)} \times \text{fuel efficiency (L km}^{-1}\text{)}}$$

67 Here, the 7.87 L/100 km and 7.5 L/100 km were used as the average gasoline and diesel  
 68 efficiency, respectively (<http://icet.org.cn/admin/upload/2014101812382577.pdf>). The fuel  
 69 density was 0.74 g mL<sup>-1</sup> for gasoline and 0.85 g mL<sup>-1</sup> for diesel (Zhang et al., 2016).

## 70 **Text S3**

### 71 **Linear regression analysis of diesel vehicles fraction and SOA<sub>IVOCs</sub>-to-SOA<sub>VOCs</sub> ratio**

$$72 \quad R = R_{DVs} \times \alpha + R_{GVs}(1 - \alpha)$$

73 where R represents the fleet average SOA<sub>IVOCs</sub>-to-SOA<sub>VOCs</sub> ratio calculated during the  
 74 campaign.  $R_{DVs}$  and  $R_{GVs}$  are the SOA<sub>IVOCs</sub>-to-SOA<sub>VOCs</sub> ratios for DVs and GV<sub>s</sub>, respectively.  
 75  $\alpha$  is the fraction of DVs in the total IVOCs-emitting vehicles traveling through the tunnel.

76 **Text S4**

77 **Estimations of IVOCs emission**

78 Firstly, we used the mileage-based  $EF_{IVOCs}$  and the average vehicle fleet composition observed  
79 in tunnel to calculate IVOCs emissions percentage of DVs and GVs (Table S4). Then, as  
80 showed in Table S4, the fuel-based  $EF_{IVOCs}$  and fuel consumptions in China in 2019  
81 (<http://www.mee.gov.cn/hjzl/sthjzk/ydyhjgl/>) were used to estimate IVOCs emissions from  
82 diesel- and gasoline-fueled engines.

83

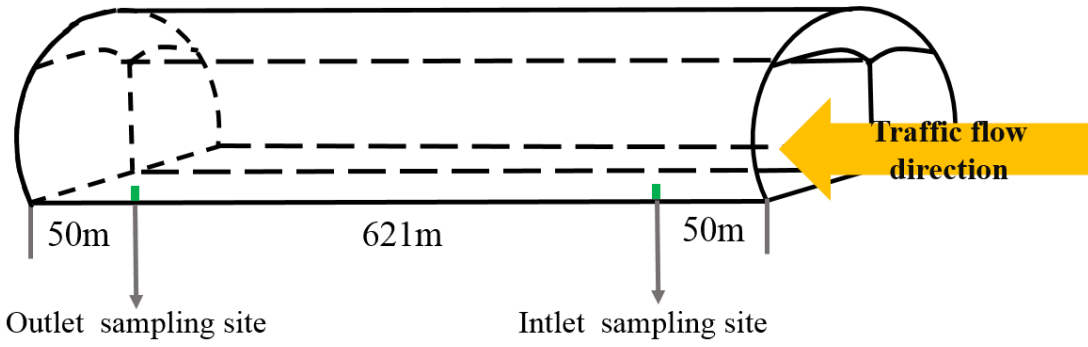

85 Figure S1. The schematic diagram of the sampling stations inside the Zhujiang tunnel.

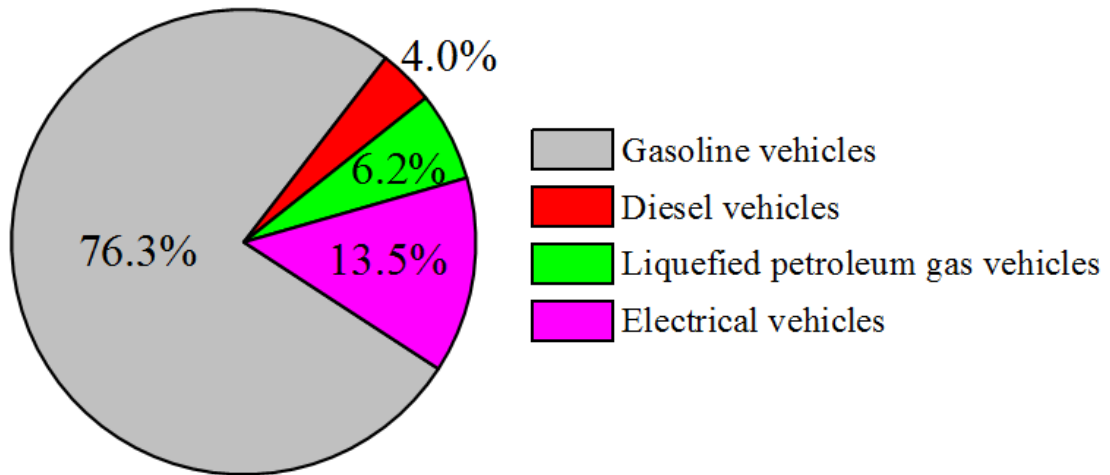

87 Figure S2. The vehicle fleet compositions during the campaign.

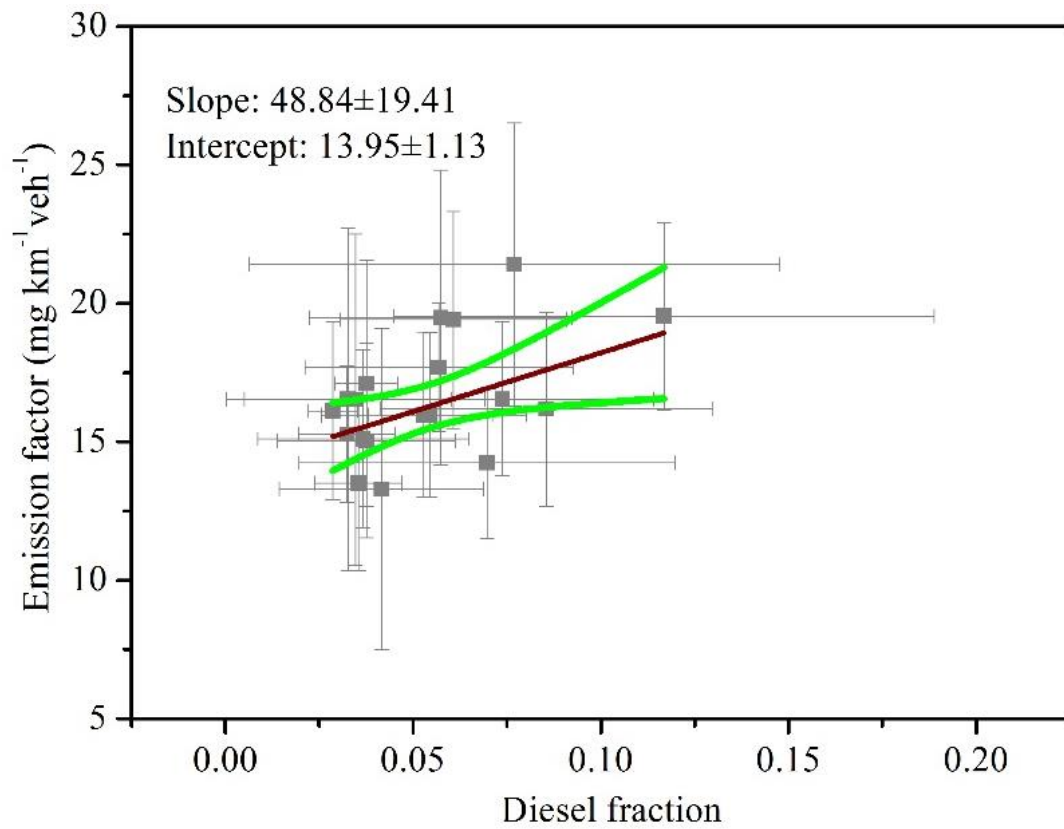

88

89 Figure S3. Linear regression analysis of diesel fraction and fleet-average  $\text{EF}_{\text{IVOCs}}$  during the  
90 campaign. The green lines represent 95% confidence intervals.

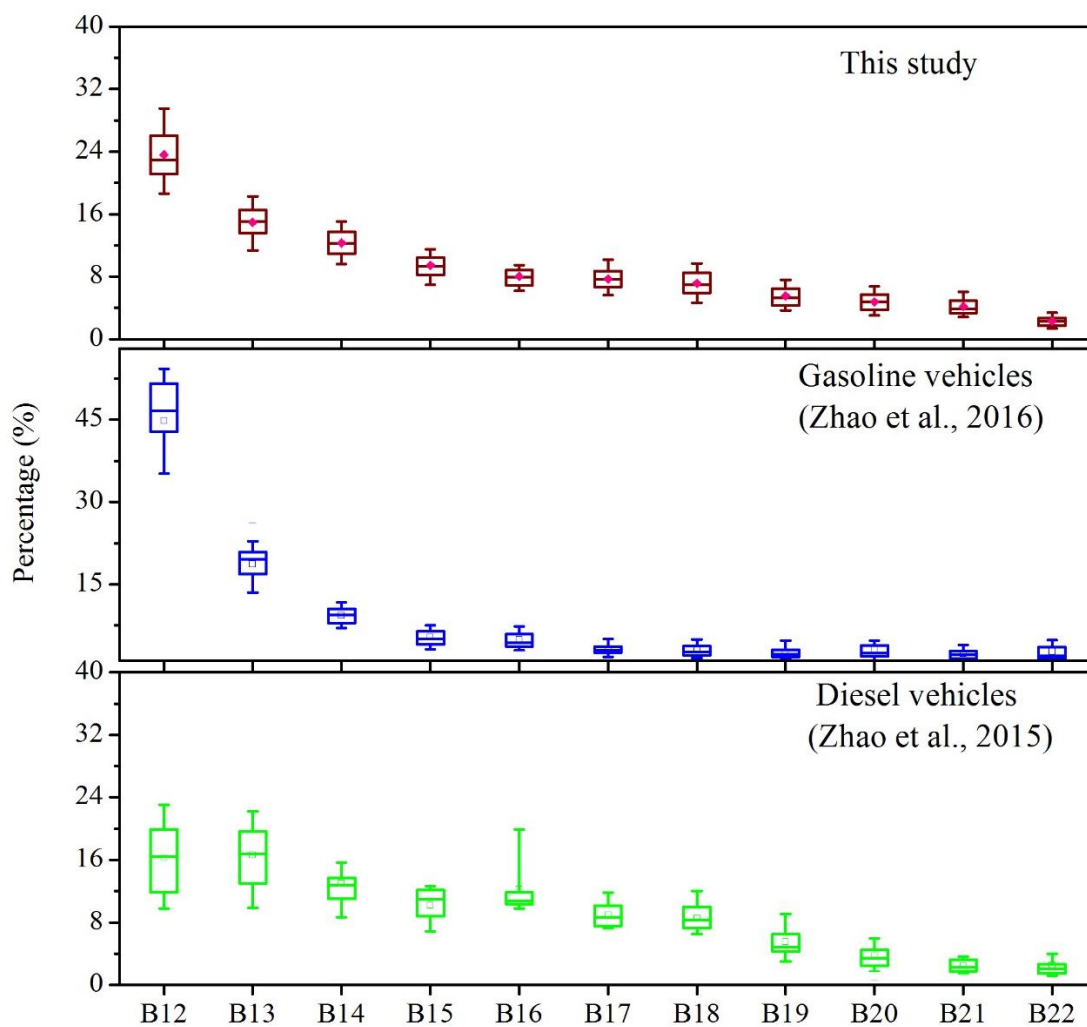

91

92 Figure S4. The comparison of distributions of total IVOCs in different volatility bins

93 determined in this study and in previous studies. The boxes represent the 75<sup>th</sup> and 25<sup>th</sup>

94 percentiles, the centerlines are the medians and squares are the averages. The whiskers represent

95 10<sup>th</sup> and 90<sup>th</sup> percentiles.

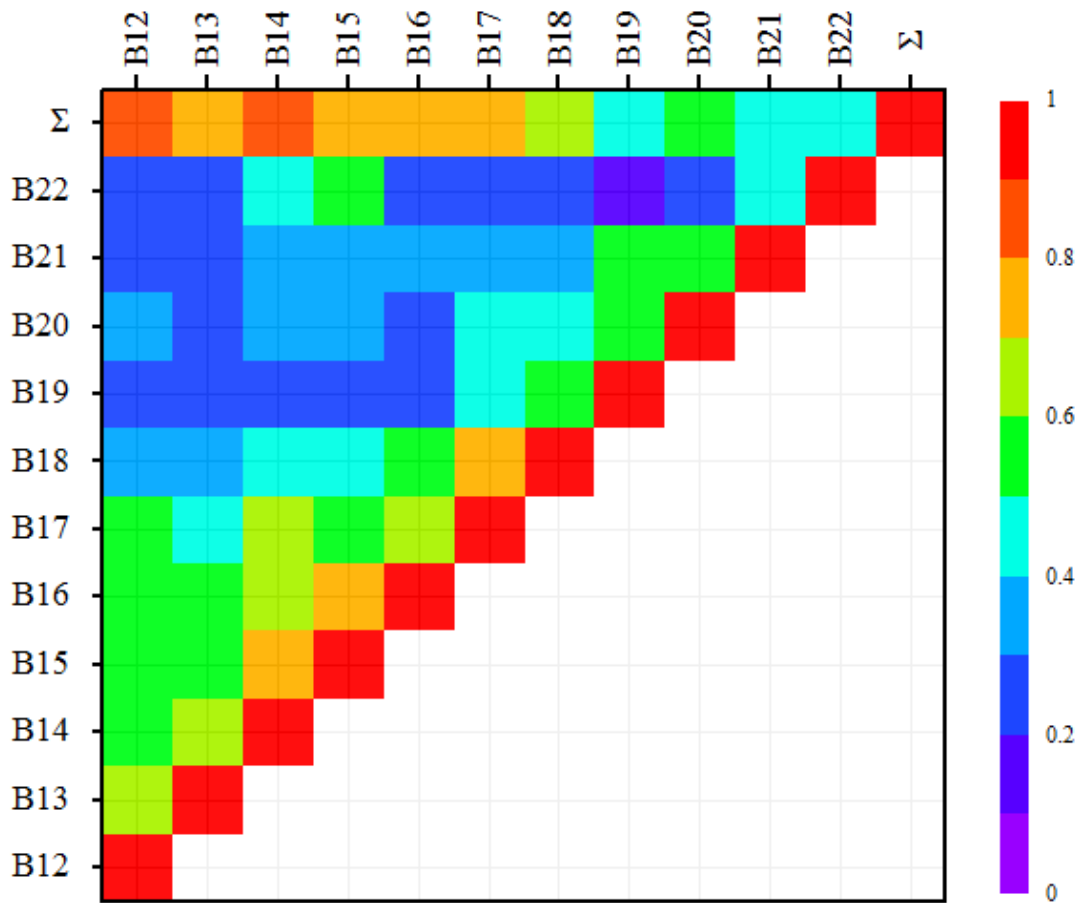

96

97 Figure S5. The Pearson correlations among IVOCs in each volatility bins ( $\Sigma$  represents sum of

98 IVOCs from B12 to B22).



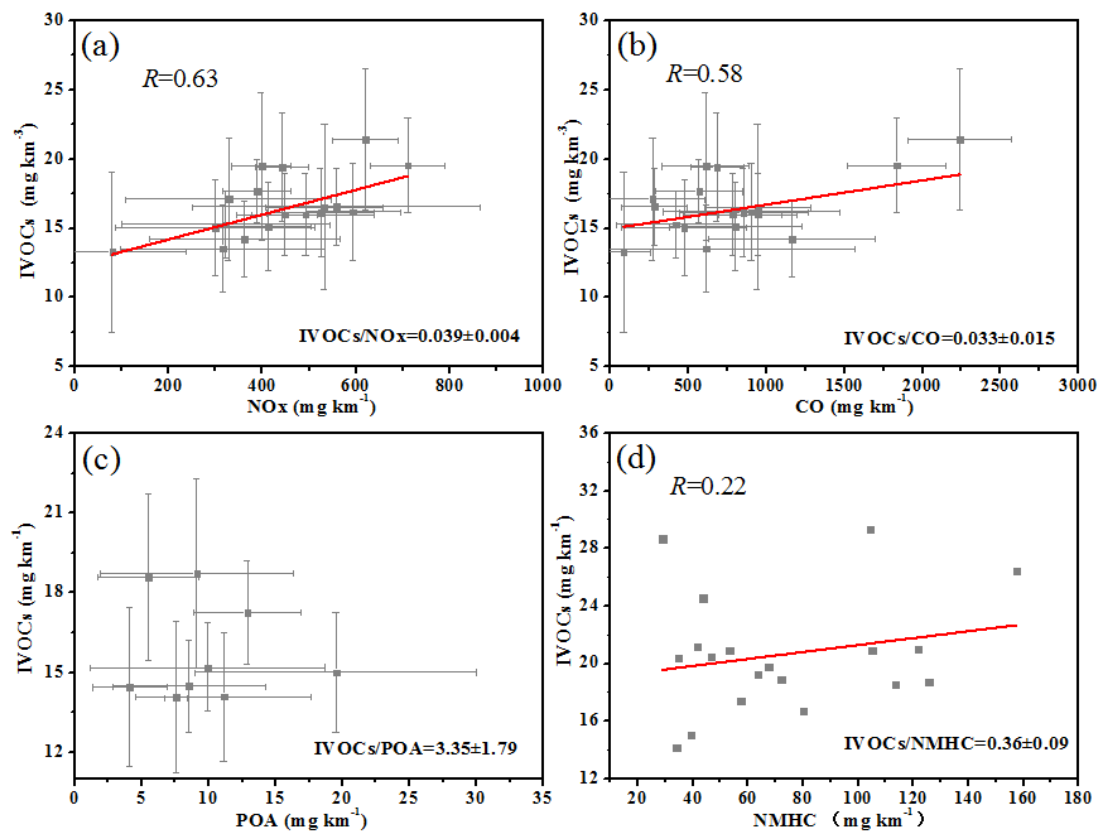

99

100 Figure S6. The relationships of IVOCs with other primary species that concurrently measured  
 101 in the tunnel.

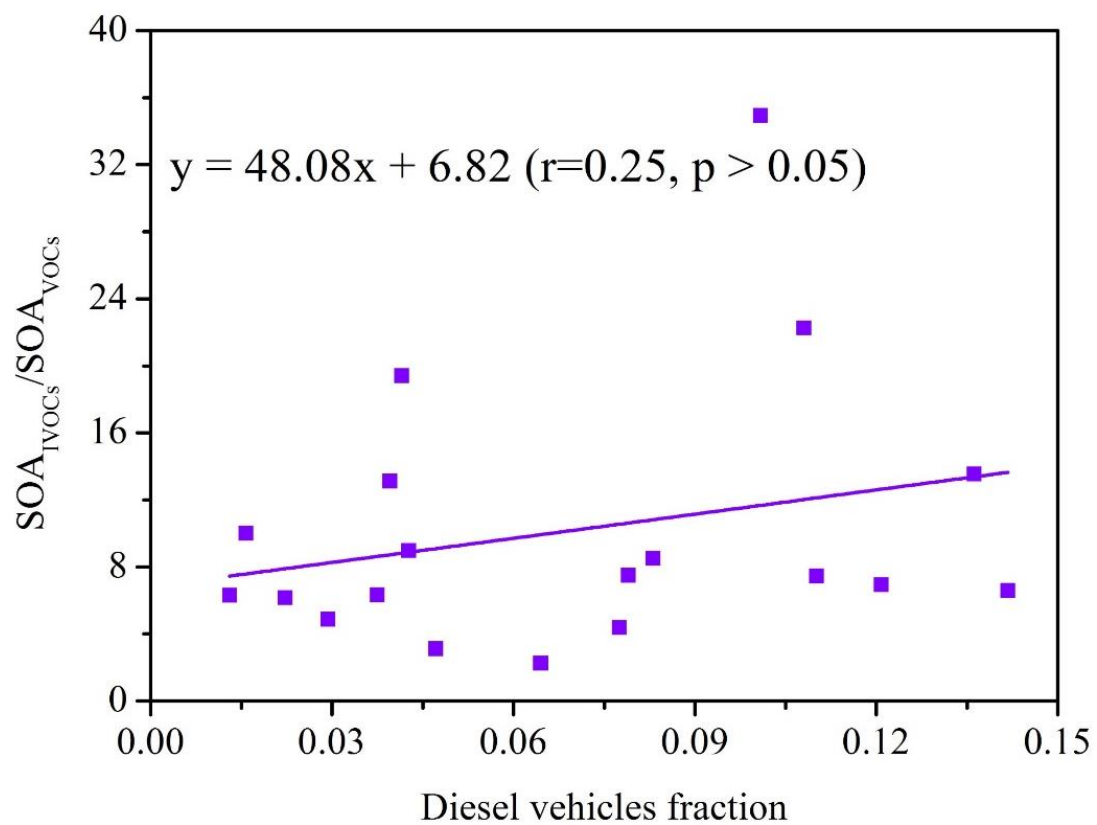

102

103 Figure S7. Linear regression analysis of diesel vehicles fraction and SOA<sub>IVOCs</sub>-to-SOA<sub>VOCs</sub> ratio.

104

105 Table S1. The emission factors of IVOCs species (mg km<sup>-1</sup>).

| Species                          | Mean ± 95% C.I. | Range      |
|----------------------------------|-----------------|------------|
| Dodecane                         | 0.38±0.03       | 0.12–0.81  |
| Tridecane                        | 0.23±0.02       | 0.11–0.61  |
| Tetradecane                      | 0.22±0.02       | 0.10–0.53  |
| Pentadecane                      | 0.19±0.02       | 0.08–0.50  |
| Hexadecane                       | 0.16±0.01       | 0.06–0.38  |
| Heptadecane                      | 0.15±0.01       | 0.06–0.29  |
| Pristane                         | 0.10±0.01       | 0.03–0.24  |
| Octadecane                       | 0.13±0.01       | 0.05–0.25  |
| Phytane                          | 0.10±0.01       | 0.04–0.22  |
| Nonadecane                       | 0.10±0.01       | 0.03–0.24  |
| Eicosane                         | 0.10±0.01       | 0.01–0.21  |
| Heneicosane                      | 0.08±0.01       | 0.01–0.19  |
| Docosane                         | 0.04±0.00       | 0.00–0.11  |
| Naphthalene                      | 0.35±0.03       | 0.14–0.82  |
| 2-Methylnaphthalene              | 0.11±0.01       | 0.05–0.29  |
| 1-Methylnaphthalene              | 0.05±0.00       | 0.02–0.13  |
| Acenaphthylene                   | 0.06±0.01       | 0.00–0.17  |
| Acenaphthene                     | 0.01±0.00       | 0.00–0.05  |
| Fluorene                         | 0.00±0.00       | 0.00–0.01  |
| Phenanthrene                     | 0.01±0.00       | 0.00–0.05  |
| Anthracene                       | 0.02±0.00       | 0.00–0.11  |
| Unspeciated b-alkanes B12        | 0.89±0.07       | 0.27–1.87  |
| Unspeciated b-alkanes B13        | 0.58±0.04       | 0.19–1.03  |
| Unspeciated b-alkanes B14        | 0.52±0.04       | 0.21–1.29  |
| Unspeciated b-alkanes B15        | 0.43±0.03       | 0.17–1.11  |
| Unspeciated b-alkanes B16        | 0.37±0.04       | 0.13–1.30  |
| Unspeciated b-alkanes B17        | 0.34±0.03       | 0.15–0.81  |
| Unspeciated b-alkanes B18        | 0.35±0.03       | 0.09–0.86  |
| Unspeciated b-alkanes B19        | 0.25±0.03       | 0.04–0.64  |
| Unspeciated b-alkanes B20        | 0.21±0.02       | 0.04–0.46  |
| Unspeciated b-alkanes B21        | 0.19±0.02       | 0.04–0.61  |
| Unspeciated b-alkanes B22        | 0.08±0.01       | 0.02–0.27  |
| Unspeciated cyclic compounds B12 | 2.36±0.23       | 0.96–7.13  |
| Unspeciated cyclic compounds B13 | 1.54±0.13       | 0.21–3.74  |
| Unspeciated cyclic compounds B14 | 1.33±0.10       | 0.42–2.69  |
| Unspeciated cyclic compounds B15 | 0.89±0.07       | 0.19–2.01  |
| Unspeciated cyclic compounds B16 | 0.82±0.07       | 0.21–2.27  |
| Unspeciated cyclic compounds B17 | 0.71±0.07       | 0.12–1.61  |
| Unspeciated cyclic compounds B18 | 0.59±0.06       | 0.00–1.67  |
| Unspeciated cyclic compounds B19 | 0.57±0.05       | 0.16–1.42  |
| Unspeciated cyclic compounds B20 | 0.49±0.06       | 0.08–1.71  |
| Unspeciated cyclic compounds B21 | 0.42±0.04       | 0.15–1.18  |
| Unspeciated cyclic compounds B22 | 0.26±0.03       | 0.07–0.68  |
| Σ Speciated IVOCs                | 2.59±0.14       | 1.43–4.37  |
| Σ UCM IVOCs                      | 14.19±0.79      | 7.41–25.60 |
| Σ IVOCs                          | 16.77±0.89      | 9.04–29.32 |

106 Table S2. The correlations and mass ratios of IVOCs with normal alkanes in the same volatility  
 107 bin.

|                  | B12/n-C12  | B13/n-C13  | B14/n-C14  | B15/n-C15  | B16/n-C16  | B17/n-C17 |
|------------------|------------|------------|------------|------------|------------|-----------|
| Ratios           | 11.20±0.61 | 11.59±0.76 | 10.03±0.60 | 9.00±0.64  | 9.02±0.63  | 9.37±0.64 |
| Correlations (R) | 0.76**     | 0.51**     | 0.60**     | 0.56**     | 0.63**     | 0.53*     |
|                  | B18/n-C18  | B19/n-C19  | B20/n-C20  | B21/n-C21  | B22/n-C22  |           |
| Ratios           | 9.90±0.73  | 10.15±0.83 | 9.71±1.62  | 10.73±1.97 | 15.74±5.38 |           |
| Correlations (R) | 0.65**     | 0.54**     | 0.34       | 0.40*      | 0.42**     |           |

108 The asterisks shown in table represent significance. \*\*p < 0.01, \*p < 0.05, no asterisks mean p > 0.05.

109 Table S3. SOA yields that used in this study.

|                                    | Species                | SOA yields        | Species                | SOA yields         |
|------------------------------------|------------------------|-------------------|------------------------|--------------------|
| Speciated IVOCs                    | Dodecane               | 0.12              | Heneicosane            | 0.55               |
|                                    | Tridecane              | 0.3               | Docosane               | 0.55               |
|                                    | Tetradecane            | 0.4               | Naphthalene            | 0.22               |
|                                    | Pentadecane            | 0.46              | 2-Methylnaphthalene    | 0.26               |
|                                    | Hexadecane             | 0.51              | 1-Methylnaphthalene    | 0.31               |
|                                    | Heptadecane            | 0.55              | Acenaphthylene         | 0.31               |
|                                    | Pristane               | 0.46              | Acenaphthene           | 0.31               |
|                                    | Octadecane             | 0.55              | Fluorene               | 0.31               |
|                                    | Phytane                | 0.51              | Phenanthrene           | 0.31               |
|                                    | Nonadecane             | 0.55              | Anthracene             | 0.31               |
|                                    | Eicosane               | 0.55              |                        |                    |
| Unspeciate b-alkanes IVOCs         | Bin12                  | 0.05              | Bin18                  | 0.51               |
|                                    | Bin13                  | 0.09              | Bin19                  | 0.55               |
|                                    | Bin14                  | 0.12              | Bin20                  | 0.55               |
|                                    | Bin15                  | 0.3               | Bin21                  | 0.55               |
|                                    | Bin16                  | 0.4               | Bin22                  | 0.55               |
|                                    | Bin17                  | 0.46              |                        |                    |
| Unspeciated cyclic compounds IVOCs | Bin12                  | 0.12              | Bin18                  | 0.55               |
|                                    | Bin13                  | 0.3               | Bin19                  | 0.55               |
|                                    | Bin14                  | 0.4               | Bin20                  | 0.55               |
|                                    | Bin15                  | 0.46              | Bin21                  | 0.55               |
|                                    | Bin16                  | 0.51              | Bin22                  | 0.55               |
|                                    | Bin17                  | 0.55              |                        |                    |
| VOCs                               | Benzene                | 0.21              | n-Heptane              | 0.009 <sup>a</sup> |
|                                    | Toluene                | 0.11              | n-Octane               | 0.041 <sup>a</sup> |
|                                    | Ethylbenzene           | 0.11              | n-Nonane               | 0.08 <sup>a</sup>  |
|                                    | m/p-Xylene             | 0.06              | n-Decane               | 0.146 <sup>a</sup> |
|                                    | Styrene                | 0.11              | 2-Methylhexane         | 0.009 <sup>b</sup> |
|                                    | o-Xylene               | 0.06              | 3-Methylhexane         | 0.009 <sup>b</sup> |
|                                    | Isopropylbenzene       | 0.11              | 2,3-Dimethylpentane    | 0.009 <sup>b</sup> |
|                                    | n-Propylbenzene        | 0.11              | 2,4-Dimethylpentane    | 0.009 <sup>b</sup> |
|                                    | m-Ethyltoluene         | 0.11              | 2,2,4-Trimethylpentane | 0.041 <sup>c</sup> |
|                                    | p-Ethyltoluene         | 0.11              | 2,3,4-Trimethylpentane | 0.041 <sup>c</sup> |
|                                    | 1,3,5-Trimethylbenzene | 0.06              | 2-Methylheptane        | 0.041 <sup>c</sup> |
|                                    | o-Ethyltoluene         | 0.06              | 3-Methylheptane        | 0.041 <sup>c</sup> |
|                                    | 1,2,4-Trimethylbenzene | 0.06              | Cyclohexane            | 0.04               |
| 1,2,3-Trimethylbenzene             | 0.06                   | Methylcyclohexane | 0.04 <sup>d</sup>      |                    |

110 SOA yields of IVOCs and single-ring aromatics were from Zhao et al. (2015); <sup>a</sup> SOA yields are from Lim and Ziemann. (2009); <sup>b</sup> SOA yields are assumed the111 same as n-Heptane; <sup>c</sup> SOA yields are assumed the same as n-October; <sup>d</sup> SOA yields are assumed the same as cyclohexane.

112 Table S4. Estimations of IVOCs emission from on-road DVs and GVs and from diesel- and  
 113 gasoline-fueled engines.

|                                         | Diesel vehicles       | Gasoline vehicles       |
|-----------------------------------------|-----------------------|-------------------------|
| Mileage-based EF (mg km <sup>-1</sup> ) | 62.79±18.37           | 13.95±1.13              |
| Fleet composition                       | 5%                    | 95%                     |
| IVOCs emission percentages              | 19.1%                 | 80.9%                   |
|                                         | Diesel-fueled engines | Gasoline-fueled engines |
| Fuel-based EFs (mg kg <sup>-1</sup> )   | 984.9±288.2           | 239.5±19.5              |
| Fuel consumptions (Tg)                  | 150                   | 120                     |
| IVOCs emissions (Gg)                    | 147.7                 | 28.74                   |

114

115 **References**

- 116 Lim, Y. B., and Ziemann, P. J.: Effects of molecular structure on aerosol yields from OH radical-  
117 initiated reactions of linear, branched, and cyclic alkanes in the presence of NO<sub>x</sub>. *Environ.*  
118 *Sci. Technol.*, 43, 2328–2334, <https://doi.org/10.1021/es803389s>, 2009.
- 119 Robinson, A. L., Donahue, N. M., Shrivastava, M. K., Weitkamp, E. A., Sage, A. M., Grieshop,  
120 A. P., Lane, T. E., Pierce, J. R., and Pandis, S. N.: Rethinking organic aerosols: semivolatile  
121 emissions and photochemical aging. *Science* 315, 1259–1262,  
122 <http://doi.org/10.1126/science.1133061>, 2007.
- 123 Zhang, Y. L., Wang, X. M., Wen, S., Herrmann, H., Yang, W. Q., Huang, X. Y., Zhang, Z.,  
124 Huang, Z. H., He, Q. F., and George, C.: On-road vehicle emissions of glyoxal and  
125 methylglyoxal from tunnel tests in urban Guangzhou, China. *Atmos. Environ.*, 127, 55–60,  
126 <http://doi.org/10.1016/j.atmosenv.2015.12.017>, 2016.
- 127 Zhao, Y. L., Hennigan, C. J., May, A. A., Tkacik, D. S., de Gouw, J. A., Gilman, J. B., Kuster,  
128 W. C., Borbon, A., and Robinson, A. L.: Intermediate-volatility organic compounds: a  
129 large source of secondary organic aerosol. *Environ. Sci. Technol.*, 48, 13743–13750,  
130 <https://doi.org/10.1021/es5035188>, 2014.
- 131 Zhao, Y. L., Nguyen, N. T., Presto, A. A., Hennigan, C. J., May, A. A., and Robinson, A. L.:  
132 Intermediate-volatility organic compound emissions from on-road diesel vehicles:  
133 chemical composition, emission factors, and estimated secondary organic aerosol  
134 production. *Environ. Sci. Technol.*, 49, 11516–11526,  
135 <https://doi.org/10.1021/acs.est.5b02841>, 2015.
- 136 Zhao, Y. L., Nguyen, N. T., Presto, A. A., Hennigan, C. J., May, A. A., and Robinson, A. L.:  
137 Intermediate-volatility organic compound emissions from on-road gasoline vehicles and  
138 small off-road gasoline engines. *Environ. Sci. Technol.*, 50, 4554–4563,  
139 <https://doi.org/10.1021/acs.est.5b06247>, 2016.
